# Supplementary material for: Functional integration of the circulatory, immune, and respiratory systems in mosquito larvae: pathogen killing in the hemocyte-rich tracheal tufts
Source: PubMed Central journal article supplement (PMC5027632; doi:10.1186/s12915-016-0305-y), 2016-09-19
Supplement: 12915_2016_305_MOESM3_ESM.pdf [file 12915_2016_305_MOESM3_ESM.pdf]

**Functional integration of the circulatory, immune, and respiratory systems in mosquito larvae: pathogen killing in the hemocyte-rich tracheal tufts**

Garrett P. League and Julián F. Hillyer (julian.hillyer@vanderbilt.edu)

Department of Biological Sciences, Vanderbilt University, Nashville, TN, U.S.A.

*BMC Biology*, 2016

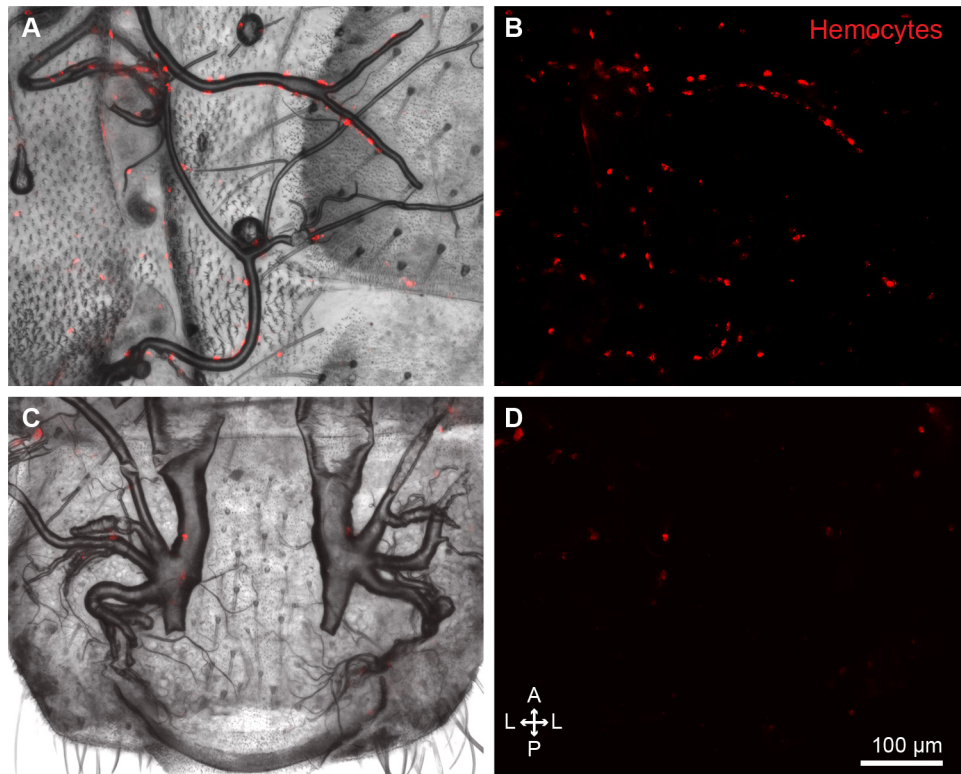

**Additional File 3: Figure S2. The sessile hemocytes of adults preferentially bind thin trachea. (A-B)** Bright-field overlay (A) and fluorescence (B) images showing hemocytes (CM-DiI; red) bound to thin abdominal trachea. **(C-D)** Bright-field overlay (C) and fluorescence (D) images showing very few hemocytes bound to the large trachea of the 8<sup>th</sup> abdominal segment, which lacks tracheal tufts. Directional arrows: A, anterior; P, posterior; L, lateral.
