# Supplementary material for: Functional integration of the circulatory, immune, and respiratory systems in mosquito larvae: pathogen killing in the hemocyte-rich tracheal tufts
Source: PubMed Central journal article supplement (PMC5027632; doi:10.1186/s12915-016-0305-y), 2016-09-19
Supplement: 12915_2016_305_MOESM8_ESM.pdf [file 12915_2016_305_MOESM8_ESM.pdf]

## Functional integration of the circulatory, immune, and respiratory systems in mosquito larvae: pathogen killing in the hemocyte-rich tracheal tufts

Garrett P. League and Julián F. Hillyer (julian.hillyer@vanderbilt.edu)

Department of Biological Sciences, Vanderbilt University, Nashville, TN, U.S.A.

*BMC Biology*, 2016

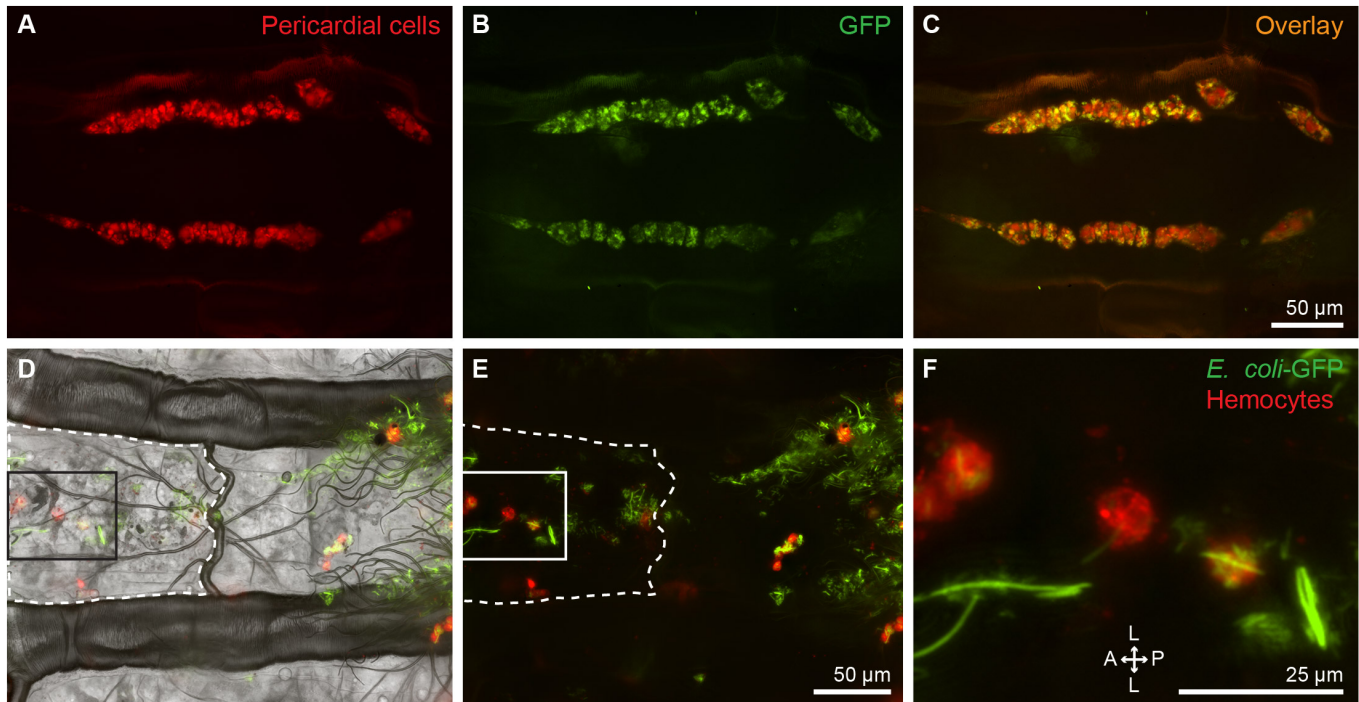

**Additional File 8: Figure S6. GFP signal from periostial region ROIs of larvae originate from pericardial cells and segmental hemocytes.** (A-C) Fluorescence images taken at 4 h post-treatment showing that pericardial cells (A; IgG 568 nm, red) pinocytose GFP (B) that is flowing with the hemolymph following its release from degrading GFP-*E. coli* (overlay of A and B is shown in C). (D-F) Bright-field and fluorescence images of a portion of the 7<sup>th</sup> and 8<sup>th</sup> abdominal segments of a dissected larva at 4 h post-injection with GFP-*E. coli* (green), showing that both the tracheal tuft hemocytes and the dorsal segmental hemocytes (CM-DiI; red) engage in phagocytosis. A group of segmental hemocytes (D-E, rectangle) that have phagocytosed *E. coli* within the 7<sup>th</sup> abdominal segment region of interest (area within dashed outline) is magnified in F. Neither pathogens nor hemocytes were detected within the periostial regions. Directional arrows: A, anterior; P, posterior; L, lateral.
